# Supplementary material for: Global review of national ambient air quality standards for PM10 and SO2 (24 h)
Source: PubMed Central journal article supplement — Air Qual Atmos Health. 2011 Jan 18;5(4):393–9. doi: 10.1007/s11869-010-0131-2 (PMC3505502; doi:10.1007/s11869-010-0131-2), 2011-01-18
Supplement: 11869_2010_131_MOESM1_ESM.pdf [file 11869_2010_131_MOESM1_ESM.pdf]

## Supplementary material for Vahlsing/Smith

### A. Comparison of Survey Respondents and Non-Respondents

The geographical distribution and selected demographics of the survey respondents and non-respondents are summarized in Table 1 and 2.

Table 1: Number of respondents & Non – respondents in each Geographical Region

| Region         | Respondents | Non – Respondents | Total |
|----------------|-------------|-------------------|-------|
| Asia           | 10          | 22                | 32    |
| Africa         | 6           | 43                | 49    |
| Central Europe | 3           | 13                | 16    |
| South America  | 2           | 30                | 32    |
| Middle East    | 1           | 16                | 17    |
| North America  | 1           | 0                 | 1     |
| Western Europe | 1           | 2                 | 3     |
| Scandinavia    | 0           | 3                 | 3     |
| Total          | 24          | 129               | 153   |

Asian countries represented the largest percent of the respondents (40 %), followed by African countries (25 %), Central European countries (12 %) and South American countries (8 %). The remaining 8 % of the respondents were from the Middle East, North America, and Western Europe. A statistical significant difference between medians was not observed between respondents and the non-respondents for any of the variables shown in Table 2.

Table 2: Selected Median of Demographics for Survey Respondents & Non – Respondents

| Demographic                                                          | Median                  |                                |
|----------------------------------------------------------------------|-------------------------|--------------------------------|
|                                                                      | Respondents<br>(n = 24) | Non – Respondents<br>(n = 129) |
| Population (2008)                                                    | 1,000,000               | 6,200,000                      |
| Urban Population (% of Total, 2008)                                  | 53                      | 49                             |
| GDP per capita (current \$US, 2008)                                  | 3,400                   | 2,800                          |
| Health expenditure per capita<br>(current US\$ 2007)                 | 130                     | 150                            |
| Energy Use<br>(kg of oil equivalent per capita, 2007)                | 850                     | 910                            |
| PM10<br>(population weighted ug/m3 2006)                             | 51                      | 37                             |
| SO2 Emissions<br>(thousand metric tons 2000)                         | 96                      | 59                             |
| General Government Final Consumption Expenditure<br>(% of GDP, 2008) | 14                      | 13                             |
| DALYS<br>(attributed to urban air pollution, 2009)                   | 1,000,000               | 930,000                        |

\*statistical significance difference (p>0.05) between respondent and non – respondents

GDP(Gross Domestic Product), DALYs (Disability Adjusted Life Years)

Source – World Bank, World Development Indicators, 2010

## Ambient Air Quality Standards & Selected Demographics

| Country Name<br>(Source of AAQS <sup>1</sup> )       | AAQS<br>Pollutant<br>(ug/m3) |     | Year <sup>2</sup> AAQS<br>Set or Revised |      | Population <sup>3</sup><br>(2008) | Urban population <sup>4</sup><br>(% of total, 2008) | GDP/capita <sup>5</sup> (current<br>US\$, 2008) | Health<br>expenditure/capita <sup>6</sup><br>(current US\$, 2006) | Energy use <sup>7</sup><br>(kg of oil<br>equivalent/capita,<br>2007) | PM10 <sup>8</sup><br>(ug/m3, 2007) | General government<br>final consumption<br>expenditure <sup>9</sup><br>(% of GDP, 2008) | Type of AAQS** |
|------------------------------------------------------|------------------------------|-----|------------------------------------------|------|-----------------------------------|-----------------------------------------------------|-------------------------------------------------|-------------------------------------------------------------------|----------------------------------------------------------------------|------------------------------------|-----------------------------------------------------------------------------------------|----------------|
|                                                      | PM10                         | SO2 | PM10                                     | SO2  |                                   |                                                     |                                                 |                                                                   |                                                                      |                                    |                                                                                         |                |
| Algeria<br>(Kerbachi, 2006)                          | 0                            | 0   | 2007                                     | 2007 | 34,373,426                        | 65                                                  | 4,845                                           | 173                                                               | 1,089                                                                | 71                                 | 13                                                                                      |                |
| Antigua & Barbuda <sup>10</sup><br>(Blacklane, 2011) | 0                            | 0   | 2007                                     | 2007 | 86,634                            | 30                                                  | 14,048                                          | 627                                                               |                                                                      | 12                                 | 18                                                                                      |                |
| Argentina<br>(Maggioria, 2006)                       | 0                            | 70  | 2006                                     |      | 39,882,980                        | 92                                                  | 8,236                                           | 663                                                               | 1,850                                                                | 73                                 | 13                                                                                      |                |

<sup>1</sup> Secondary sources are listed. If no source is provided the AAQS data came from the survey results discussed in this paper.

<sup>2</sup> The most recent year each AAQS was revised or the year the AAQS was set, if has not been revised. For example, the AAQS or limit values in the EU were last considered for revision in 2008, despite the fact that they did not change from 1999 limit values set in 1999. If the country does not have AAQS then this is the date the most recent document was published stating that there are no AAQS.

<sup>3</sup> Source: World Bank, World Development Indicators, 2010, [www.worldbank.org](http://www.worldbank.org)

<sup>4</sup> Source: World Bank, World Development Indicators, 2010, [www.worldbank.org](http://www.worldbank.org)

<sup>5</sup> Source: World Bank, World Development Indicators, 2010, [www.worldbank.org](http://www.worldbank.org)

<sup>6</sup> Source: World Bank, World Development Indicators, 2010, [www.worldbank.org](http://www.worldbank.org)

<sup>7</sup> Source: World Bank, World Development Indicators, 2010, [www.worldbank.org](http://www.worldbank.org)

<sup>8</sup> Particulate matter concentrations refer to fine suspended particulates less than 10 microns in diameter (PM10) that are capable of penetrating deep into the respiratory tract and causing significant health damage. Data for countries and aggregates for regions and income groups are urban-population weighted PM10 levels in residential areas of cities with more than 100,000 residents. The estimates represent the average annual exposure level of the average urban resident to outdoor particulate matter. The state of a country's technology and pollution controls is an important determinant of particulate matter concentrations (Source: World Bank, World Development Indicators, 2010, [www.worldbank.org](http://www.worldbank.org)).

<sup>9</sup> General government final consumption expenditure (formerly general government consumption) includes all government current expenditures for purchases of goods and services (including compensation of employees). It also includes most expenditure on national defense and security, but excludes government military expenditures that are part of government capital formation. Source: World Bank, World Development Indicators, 2010, [www.worldbank.org](http://www.worldbank.org)

<sup>10</sup> Although Antigua and Barbuda have no AAQS they use the WHO AQG when necessary

| Country Name<br>(Source of AAQS <sup>1</sup> )               | AAQS<br>Pollutant<br>(ug/m3) |                      | Year <sup>2</sup> AAQS<br>Set or Revised |      | Population <sup>3</sup><br>(2008) | Urban population <sup>4</sup><br>(% of total, 2008) | GDP/capita <sup>5</sup> (current<br>US\$, 2008) | Health<br>expenditure/capita <sup>6</sup><br>(current US\$, 2006) | Energy use <sup>7</sup><br>(kg of oil<br>equivalent/capita,<br>2007) | PM10 <sup>8</sup><br>(ug/m3, 2007) | General government<br>final consumption<br>expenditure <sup>9</sup><br>(% of GDP, 2008) | Type of AAQS** |
|--------------------------------------------------------------|------------------------------|----------------------|------------------------------------------|------|-----------------------------------|-----------------------------------------------------|-------------------------------------------------|-------------------------------------------------------------------|----------------------------------------------------------------------|------------------------------------|-----------------------------------------------------------------------------------------|----------------|
|                                                              | PM10                         | SO2                  | PM10                                     | SO2  |                                   |                                                     |                                                 |                                                                   |                                                                      |                                    |                                                                                         |                |
| Armenia<br>(survey respondent)                               | 0                            | yes <sup>11</sup>    | 2007                                     | 2004 | 3,077,087                         | 64                                                  | 3,873                                           | 133                                                               | 926                                                                  | 59                                 | 12                                                                                      |                |
| Australia<br>(Aus. Gov., 1998)                               | 50                           | 209<br>(0.08<br>ppm) | 1998                                     | 1998 | 21,431,800                        | 89                                                  | 47,370                                          | 3,986                                                             | 5,888                                                                | 15                                 | 1                                                                                       |                |
| Austria<br>(Council of EU, 2008)                             | 50                           | 125                  | 2008                                     | 2008 | 8,336,926                         | 67                                                  | 49,599                                          | 4,523                                                             | 3,997                                                                | 33                                 | 18                                                                                      | D              |
| The Bahamas <sup>12</sup><br>(Min. of Environment,<br>2006)) | 0                            | 0                    | 2008                                     | 2008 | 337,668                           | 84                                                  |                                                 | 1,535                                                             |                                                                      |                                    |                                                                                         |                |
| Bangladesh<br>(Govt. Bangladesh, 2005)                       | 150                          | 365                  | 2005                                     | 2005 | 160,000,128                       | 27                                                  | 497                                             | 15                                                                | 163                                                                  | 135                                | 5                                                                                       | S              |
| Barbados<br>(EPD, 2004)                                      | 150                          |                      | 2004                                     |      | 255,203                           | 40                                                  | 14,426                                          | 932                                                               |                                                                      | 40                                 |                                                                                         | S              |
| Belarus<br>(WHO, 2003)                                       | 0                            | 200                  |                                          |      | 9,680,850                         | 73                                                  | 6,230                                           | 302                                                               | 2,891                                                                | 6                                  | 17                                                                                      | M              |
| Belgium<br>(Council of EU, 2008)                             | 50                           | 125                  | 2008                                     | 2008 | 10,708,433                        | 97                                                  | 47,085                                          | 4,056                                                             | 5,366                                                                | 22                                 | 23                                                                                      | D              |
| Belize <sup>13</sup><br>(Law Rev. Com. 2003)                 | 0                            | 80                   | 2003                                     | 2003 | 322,100                           | 52                                                  | 4,218                                           | 174                                                               |                                                                      | 15                                 | 16                                                                                      | S              |
| Benin<br>(Min de l'Habitat, 2003)                            | 0                            | 0                    | 2003                                     | 2003 | 8,662,086                         | 41                                                  | 771                                             | 32                                                                | 343                                                                  | 46                                 |                                                                                         |                |

<sup>11</sup> If the survey respondent indicated that their country had AAQS for pollutant, but did not specify what the AAQS it was assumed that the country had the least stringent AAQS on the map, but the country was not included in average AAQA calculation.

<sup>12</sup> The Bahamas has drafted AAQS (The Environmental Planning and Protection Act of 2005. Pollution Control and Waste Management Regulations (preliminary draft May 18, 2005), but they have not been adopted.

<sup>13</sup> Residential and rural SO<sub>2</sub> AAQS. The industrial and mixed use SO<sub>2</sub> AAQS is 120 ug/m<sup>3</sup> and the sensitive AAQS is 30 ug/m<sup>3</sup>.

| Country Name<br>(Source of AAQS <sup>1</sup> ) | AAQS<br>Pollutant<br>(ug/m3) |                     | Year <sup>2</sup> AAQS<br>Set or Revised |      | Population <sup>3</sup><br>(2008) | Urban population <sup>4</sup><br>(% of total, 2008) | GDP/capita <sup>5</sup> (current<br>US\$, 2008) | Health<br>expenditure/capita <sup>6</sup><br>(current US\$, 2006) | Energy use <sup>7</sup><br>(kg of oil<br>equivalent/capita,<br>2007) | PM10 <sup>8</sup><br>(ug/m3, 2007) | General government<br>final consumption<br>expenditure <sup>9</sup><br>(% of GDP, 2008) | Type of AAQS** |
|------------------------------------------------|------------------------------|---------------------|------------------------------------------|------|-----------------------------------|-----------------------------------------------------|-------------------------------------------------|-------------------------------------------------------------------|----------------------------------------------------------------------|------------------------------------|-----------------------------------------------------------------------------------------|----------------|
|                                                | PM10                         | SO2                 | PM10                                     | SO2  |                                   |                                                     |                                                 |                                                                   |                                                                      |                                    |                                                                                         |                |
| Bolivia<br>(Maggioria, 2006)                   | 150                          | 365                 | 1992                                     | 1992 | 9,694,113                         | 66                                                  | 1,720                                           | 69                                                                | 571                                                                  | 94                                 | 13                                                                                      | S              |
| Botswana<br>(survey respondent)                | 0                            | 300                 | 2008                                     | 2001 | 1,921,122                         | 60                                                  | 6,982                                           | 372                                                               | 1,068                                                                | 67                                 | 20                                                                                      | S              |
| Brazil*<br>(Maggioria, 2006)                   | 150                          | 365                 | 1990                                     | 1990 | 191,971,506                       | 86                                                  | 8,205                                           | 606                                                               | 1,239                                                                | 23                                 | 20                                                                                      | S              |
| Brunei Darussalam*<br>(survey respondent)      | Yes                          | 0                   | 2007                                     | 2007 | 392,280                           | 75                                                  |                                                 | 753                                                               | 7,190                                                                | 54                                 |                                                                                         | S              |
| Bulgaria<br>(Council of EU, 2008)              | 50                           | 125                 | 2008                                     | 2008 | 7,623,395                         | 71                                                  | 6,546                                           | 384                                                               | 2,641                                                                | 57                                 | 16                                                                                      | D              |
| Cameroon<br>(survey respondent)                | 260                          | 125                 | 2007                                     | 2007 | 19,088,385                        | 57                                                  | 1,226                                           | 54                                                                | 391                                                                  | 62                                 |                                                                                         | S              |
| Canada <sup>14</sup><br>(Health Canada, 2006)  | 0                            | 301<br>(115<br>ppb) | 2008                                     | 1998 | 33,311,400                        | 80                                                  | 45,070                                          | 4,409                                                             | 8,169                                                                | 17                                 |                                                                                         |                |
| Chile<br>(survey respondent)                   | 150                          | 250                 | 2001                                     |      | 16,803,952                        | 88                                                  | 10,084                                          | 615                                                               | 1,851                                                                | 48                                 | 12                                                                                      | S              |
| China<br>(personal communication)              | 50                           | 50                  | 2000                                     | 2000 | 1,324,655,000                     | 43                                                  | 3,267                                           | 108                                                               | 1,484                                                                | 73                                 | 14                                                                                      | S              |
| Colombia<br>(Maggioria, 2006)                  | 150                          | 250                 | 2006                                     | 2006 | 45,012,096                        | 75                                                  | 5,416                                           | 284                                                               | 655                                                                  | 22                                 | 16                                                                                      | S              |
| Costa Rica<br>(Maggioria, 2006)                | 150                          | 365                 | 2002                                     | 2002 | 4,519,126                         | 63                                                  | 6,564                                           | 488                                                               | 1,070                                                                | 36                                 | 14                                                                                      |                |
| Croatia<br>(survey respondent)                 | 50                           | 125                 | 2004                                     | 2004 | 4,434,000                         | 57                                                  | 15,637                                          | 1,009                                                             | 2,101                                                                | 30                                 | 19                                                                                      | S              |
| Cyprus<br>(Council of EU, 2008)                | 50                           | 125                 | 2008                                     | 2008 | 862,434                           | 70                                                  | 31,410                                          | 1,778                                                             | 2,854                                                                | 44                                 | 19                                                                                      | D              |

<sup>14</sup> The maximum acceptable level was used in this research. The maximum tolerable level is 306 ppb.

| Country Name<br>(Source of AAQS <sup>1</sup> ) | AAQS<br>Pollutant<br>(ug/m3) |                      | Year <sup>2</sup> AAQS<br>Set or Revised |      | Population <sup>3</sup><br>(2008) | Urban population <sup>4</sup><br>(% of total, 2008) | GDP/capita <sup>5</sup> (current<br>US\$, 2008) | Health<br>expenditure/capita <sup>6</sup><br>(current US\$, 2006) | Energy use <sup>7</sup><br>(kg of oil<br>equivalent/capita,<br>2007) | PM10 <sup>8</sup><br>(ug/m3, 2007) | General government<br>final consumption<br>expenditure <sup>9</sup><br>(% of GDP, 2008) | Type of AAQS** |
|------------------------------------------------|------------------------------|----------------------|------------------------------------------|------|-----------------------------------|-----------------------------------------------------|-------------------------------------------------|-------------------------------------------------------------------|----------------------------------------------------------------------|------------------------------------|-----------------------------------------------------------------------------------------|----------------|
|                                                | PM10                         | SO2                  | PM10                                     | SO2  |                                   |                                                     |                                                 |                                                                   |                                                                      |                                    |                                                                                         |                |
| Czech Republic<br>(Council of EU, 2008)        | 50                           | 125                  | 2008                                     | 2008 | 10,424,336                        | 74                                                  | 20,673                                          | 1,141                                                             | 4,428                                                                | 21                                 | 20                                                                                      | D              |
| Denmark<br>(Council of EU, 2008)               | 50                           | 125                  | 2008                                     | 2008 | 5,493,621                         | 87                                                  | 62,118                                          | 5,551                                                             | 3,598                                                                | 19                                 | 27                                                                                      | D              |
| Dominican Republic<br>(Maggioria, 2006)        | 150                          | 150                  | 2002                                     | 2002 | 9,952,711                         | 69                                                  | 4,576                                           | 224                                                               | 804                                                                  | 20                                 | 8                                                                                       | S              |
| Ecuador<br>(Maggioria, 2006)                   | 150                          | 350                  | 2003                                     | 2003 | 13,481,424                        | 66                                                  | 4,056                                           | 200                                                               | 885                                                                  | 25                                 | 11                                                                                      |                |
| Egypt<br>(survey respondent)                   | 150                          | 150                  | 2005                                     |      | 81,527,172                        | 43                                                  | 1,991                                           | 101                                                               | 840                                                                  | 119                                | 11                                                                                      | S              |
| El Salvador<br>(Maggioria, 2006)               | 150                          | 365                  | 2003                                     | 2003 | 6,133,910                         | 61                                                  | 3,605                                           | 206                                                               | 800                                                                  | 33                                 | 9                                                                                       | S              |
| Estonia<br>(Council of EU, 2008)               | 50                           | 125                  | 2008                                     | 2008 | 1,340,675                         | 69                                                  | 17,454                                          | 837                                                               | 4,198                                                                | 13                                 | 19                                                                                      | D              |
| Ethiopia<br>(Etyemezian V, 2005)               | 150                          | 365<br>(0.14<br>ppm) | 2003                                     | 2003 | 80,713,434                        | 17                                                  | 317                                             | 9                                                                 | 290                                                                  | 68                                 | 10                                                                                      | G              |
| Finland<br>(Council of EU, 2008)               | 50                           | 125                  | 2008                                     | 2008 | 5,313,399                         | 63                                                  | 51,323                                          | 3,809                                                             | 6,895                                                                | 18                                 | 22                                                                                      | D              |
| France<br>(Council of EU, 2008)                | 50                           | 125                  | 2008                                     | 2008 | 62,277,432                        | 77                                                  | 44,508                                          | 4,627                                                             | 4,258                                                                | 13                                 | 23                                                                                      | D              |
| The Gambia<br>(Sarr, 2008)                     | 50                           | 125                  | 1999                                     | 1999 | 1,660,200                         | 56                                                  | 489                                             | 22                                                                |                                                                      | 86                                 | 16                                                                                      |                |
| Georgia<br>(survey respondent)                 | 0                            | yes                  | 2007                                     | 2003 | 4,307,011                         | 53                                                  | 2,970                                           | 191                                                               | 767                                                                  | 47                                 | 14                                                                                      | S              |
| Germany<br>(Council of EU, 2008)               | 50                           | 125                  | 2008                                     | 2008 | 82,110,097                        | 74                                                  | 44,446                                          | 4,209                                                             | 4,027                                                                | 19                                 | 18                                                                                      | D              |
| Ghana<br>(survey respondent)                   | 70                           | 100                  | 2000                                     | 2000 | 23,350,927                        | 50                                                  | 713                                             | 54                                                                | 415                                                                  | 34                                 | 20                                                                                      | G              |

| Country Name<br>(Source of AAQS <sup>1</sup> )  | AAQS<br>Pollutant<br>(ug/m3) |     | Year <sup>2</sup> AAQS<br>Set or Revised |      | Population <sup>3</sup><br>(2008) | Urban population <sup>4</sup><br>(% of total, 2008) | GDP/capita <sup>5</sup> (current<br>US\$, 2008) | Health<br>expenditure/capita <sup>6</sup><br>(current US\$, 2006) | Energy use <sup>7</sup><br>(kg of oil<br>equivalent/capita,<br>2007) | PM10 <sup>8</sup><br>(ug/m3, 2007) | General government<br>final consumption<br>expenditure <sup>9</sup><br>(% of GDP, 2008) | Type of AAQS** |
|-------------------------------------------------|------------------------------|-----|------------------------------------------|------|-----------------------------------|-----------------------------------------------------|-------------------------------------------------|-------------------------------------------------------------------|----------------------------------------------------------------------|------------------------------------|-----------------------------------------------------------------------------------------|----------------|
|                                                 | PM10                         | SO2 | PM10                                     | SO2  |                                   |                                                     |                                                 |                                                                   |                                                                      |                                    |                                                                                         |                |
| Greece<br>(Council of EU, 2008)                 | 50                           | 125 | 2008                                     | 2008 | 11,237,094                        | 61                                                  | 31,670                                          | 2,679                                                             | 2,875                                                                | 36                                 | 17                                                                                      | D              |
| Grenada<br>(survey respondent)                  | 0                            | 0   | 2007                                     | 2007 | 103,538                           | 31                                                  | 6,162                                           | 416                                                               |                                                                      | 20                                 | 16                                                                                      |                |
| Guatemala<br>(Maggiora, 2006)                   | 0                            | 0   | 2006                                     | 2006 | 13,686,128                        | 49                                                  | 2,848                                           | 186                                                               | 620                                                                  | 62                                 | 9                                                                                       |                |
| Honduras<br>(Maggiora, 2006)                    | 0                            | 0   | 2006                                     | 2006 | 7,318,789                         | 48                                                  | 1,823                                           | 107                                                               | 661                                                                  | 43                                 | 16                                                                                      |                |
| Hungary<br>(Council of EU, 2008)                | 50                           | 125 | 2008                                     | 2008 | 10,038,188                        | 68                                                  | 15,408                                          | 1,019                                                             | 2,658                                                                | 19                                 | 9                                                                                       | D              |
| India<br>(Govt. of India, 2009)                 | 100                          | 80  | 2009                                     | 2009 | 1,139,964,932                     | 30                                                  | 1,017                                           | 40                                                                | 529                                                                  | 65                                 | 12                                                                                      | S              |
| Indonesia<br>(Govt. of Indonesia, 1999)         | 150                          | 365 | 1999                                     | 1999 | 227,345,082                       | 51                                                  | 2,246                                           | 42                                                                | 849                                                                  | 83                                 | 8                                                                                       | S              |
| Ireland<br>(Council of EU, 2008)                | 50                           | 125 | 2008                                     | 2008 | 4,425,675                         | 61                                                  | 60,460                                          | 4,556                                                             | 3,457                                                                | 16                                 |                                                                                         | D              |
| Israel <sup>15</sup><br>(Govt. of Israel, 1992) | 150                          | 280 | 1992                                     | 1992 | 7,308,800                         | 92                                                  | 27,652                                          | 1,893                                                             | 3,059                                                                | 31                                 | 25                                                                                      |                |
| Italy<br>(Council of EU, 2008)                  | 50                           | 125 | 2008                                     | 2008 | 59,832,179                        | 68                                                  | 38,492                                          | 3,136                                                             | 3,001                                                                | 27                                 | 20                                                                                      | D              |

<sup>15</sup> PM<sub>10</sub> is defined as respirable particulate matter.

| Country Name<br>(Source of AAQS <sup>1</sup> )        | AAQS<br>Pollutant<br>(ug/m3) |     | Year <sup>2</sup> AAQS<br>Set or Revised |      | Population <sup>3</sup><br>(2008) | Urban population <sup>4</sup><br>(% of total, 2008) | GDP/capita <sup>5</sup> (current<br>US\$, 2008) | Health<br>expenditure/capita <sup>6</sup><br>(current US\$, 2006) | Energy use <sup>7</sup><br>(kg of oil<br>equivalent/capita,<br>2007) | PM10 <sup>8</sup><br>(ug/m3, 2007) | General government<br>final consumption<br>expenditure <sup>9</sup><br>(% of GDP, 2008) | Type of AAQS** |
|-------------------------------------------------------|------------------------------|-----|------------------------------------------|------|-----------------------------------|-----------------------------------------------------|-------------------------------------------------|-------------------------------------------------------------------|----------------------------------------------------------------------|------------------------------------|-----------------------------------------------------------------------------------------|----------------|
|                                                       | PM10                         | SO2 | PM10                                     | SO2  |                                   |                                                     |                                                 |                                                                   |                                                                      |                                    |                                                                                         |                |
| Jamaica<br>(Claude Davis, 2006)                       | 150                          | 365 | 2006                                     | 2006 | 2,687,200                         | 53                                                  | 5,438                                           | 224                                                               | 1,852                                                                | 43                                 |                                                                                         | S              |
| Japan<br>(Schwela, 2006)                              | 100                          | 105 |                                          |      | 127,704,000                       | 66                                                  | 38,455                                          | 2,751                                                             | 4,019                                                                | 30                                 |                                                                                         | S              |
| Kenya <sup>16</sup><br>(Govt. of Kenya, 2009)         | 0                            | 0   | 2004                                     | 2004 | 38,765,312                        | 22                                                  | 783                                             | 34                                                                | 485                                                                  | 36                                 | 17                                                                                      |                |
| Korea, Rep.<br>(Schwela, 2006)                        | 150                          |     |                                          |      | 48,607,000                        | 81                                                  | 19,115                                          | 1,362                                                             | 4,586                                                                | 35                                 | 15                                                                                      | S              |
| Latvia<br>(Council of EU, 2008)                       | 50                           | 125 | 2008                                     | 2008 | 2,266,094                         | 68                                                  | 14,908                                          | 784                                                               | 2,052                                                                | 16                                 | 20                                                                                      | D              |
| Lesotho<br>(survey respondent)                        | 0                            | 0   | 2007                                     | 2007 | 2,049,429                         | 25                                                  | 791                                             | 51                                                                |                                                                      | 41                                 | 27                                                                                      |                |
| Lithuania<br>(Council of EU, 2008)                    | 50                           | 125 | 2008                                     | 2008 | 3,358,115                         | 67                                                  | 14,098                                          | 717                                                               | 2,740                                                                | 19                                 | 18                                                                                      | D              |
| Luxembourg<br>(Council of EU, 2008)                   | 50                           | 125 | 2008                                     | 2008 | 488,650                           | 82                                                  | 109,903                                         | 7,439                                                             | 8,790                                                                | 15                                 | 16                                                                                      | D              |
| Malta<br>(Council of EU, 2008)                        | 50                           | 125 | 2008                                     | 2008 | 411,950                           | 94                                                  |                                                 | 1,362                                                             | 2,120                                                                |                                    |                                                                                         | D              |
| Mauritius<br>(survey respondent)                      | 100                          | 200 | 1997                                     | 1997 | 1,268,854                         | 42                                                  | 7,345                                           | 247                                                               |                                                                      | 18                                 | 13                                                                                      | S              |
| Mexico<br>(SEMARNAT, 2005)<br>(Min. of Health., 1993) | 120                          | 341 | 2005                                     | 1994 | 106,350,434                       | 77                                                  | 10,232                                          | 564                                                               | 1,750                                                                | 36                                 | 10                                                                                      | S              |
| Moldova<br>(Cojocaru, 2008)                           | 0                            | 50  | 2008                                     |      | 3,633,369                         | 42                                                  | 1,694                                           | 127                                                               | 910                                                                  | 36                                 | 21                                                                                      | M              |

<sup>16</sup> Draft AAQS were promulgated. See reference.



| Country Name<br>(Source of AAQS <sup>1</sup> ) | AAQS |     | Year <sup>2</sup> AAQS<br>Set or Revised |      | Population <sup>3</sup><br>(2008) | Urban population <sup>4</sup><br>(% of total, 2008) | GDP/capita <sup>5</sup> (current<br>US\$, 2008) | Health<br>expenditure/capita <sup>6</sup><br>(current US\$, 2006) | Energy use <sup>7</sup><br>(kg of oil<br>equivalent/capita,<br>2007) | PM10 <sup>8</sup><br>(ug/m3, 2007) | General government<br>final consumption<br>expenditure <sup>9</sup><br>(% of GDP, 2008) | Type of AAQS** |
|------------------------------------------------|------|-----|------------------------------------------|------|-----------------------------------|-----------------------------------------------------|-------------------------------------------------|-------------------------------------------------------------------|----------------------------------------------------------------------|------------------------------------|-----------------------------------------------------------------------------------------|----------------|
|                                                | PM10 | SO2 | PM10                                     | SO2  |                                   |                                                     |                                                 |                                                                   |                                                                      |                                    |                                                                                         |                |
| Myanmar<br>(survey respondent)                 | 0    | 0   | 2007                                     | 2007 | 49,563,019                        | 33                                                  |                                                 | 7                                                                 | 319                                                                  | 58                                 |                                                                                         |                |
| Nepal<br>(survey respondent; Sah,<br>2003)     | 120  | 70  | 2003                                     | 2003 | 28,809,526                        | 17                                                  | 438                                             | 20                                                                | 338                                                                  | 34                                 | 10                                                                                      | S              |
| Netherlands<br>(Council of EU, 2008)           | 50   | 125 | 2008                                     | 2008 | 16,445,593                        | 82                                                  | 52,963                                          | 4,243                                                             | 4,909                                                                | 34                                 | 25                                                                                      | D              |
| New Zealand<br>(Min. for the Envir, 2004)      | 50   | 0   | 2004                                     | 2004 | 4,268,900                         | 87                                                  | 30,439                                          | 2,790                                                             | 3,966                                                                | 14                                 |                                                                                         |                |
| Nicaragua<br>(Maggioria, 2006)                 | 0    | 0   | 2006                                     | 2006 | 5,667,325                         | 57                                                  | 1,163                                           | 92                                                                | 621                                                                  | 28                                 |                                                                                         |                |
| Pakistan<br>(survey respondent)                | 0    | 0   | 2007                                     | 2007 | 166,111,487                       | 36                                                  | 991                                             | 23                                                                | 512                                                                  | 120                                | 12                                                                                      |                |
| Panama<br>(Maggioria, 2006)                    | 0    | 0   | 2006                                     | 2006 | 3,398,823                         | 73                                                  | 6,793                                           | 396                                                               | 845                                                                  | 35                                 | 11                                                                                      |                |
| Peru<br>(Maggioria, 2006)                      | 150  | 365 | 2001                                     | 2001 | 28,836,700                        | 71                                                  | 4,477                                           | 160                                                               | 494                                                                  | 54                                 | 9                                                                                       |                |
| Philippines<br>(survey respondent)             | 150  | 180 | 1999                                     | 1999 | 90,348,437                        | 65                                                  | 1,847                                           | 63                                                                | 451                                                                  | 23                                 | 10                                                                                      | G              |
| Poland<br>(Council of EU, 2008)                | 50   | 125 | 2008                                     | 2008 | 38,125,759                        | 61                                                  | 13,845                                          | 716                                                               | 2,547                                                                | 37                                 | 19                                                                                      | D              |
| Portugal<br>(Council of EU, 2008)              | 50   | 125 | 2008                                     | 2008 | 10,622,413                        | 59                                                  | 22,923                                          | 2,108                                                             | 2,363                                                                | 23                                 | 21                                                                                      | D              |
| Romania<br>(Council of EU, 2008)               | 50   | 125 | 2008                                     | 2008 | 21,513,622                        | 54                                                  | 9,300                                           | 369                                                               | 1,806                                                                | 14                                 | 16                                                                                      | D              |
| Russian Federation<br>(Sakhalin Energy, 2005)  | 0    | 50  | 2008                                     |      | 141,950,000                       | 73                                                  | 11,832                                          | 493                                                               | 4,730                                                                | 18                                 | 17                                                                                      | M              |
| Senegal<br>(Govt. of Senegal, 2003)            | 260  | 125 | 2003                                     | 2003 | 12,211,181                        | 42                                                  | 1,087                                           | 54                                                                | 225                                                                  | 95                                 | 10                                                                                      | S              |

| Country Name<br>(Source of AAQS <sup>1</sup> )                                            | AAQS<br>Pollutant<br>(ug/m3) |     | Year <sup>2</sup> AAQS<br>Set or Revised |      | Population <sup>3</sup><br>(2008) | Urban population <sup>4</sup><br>(% of total, 2008) | GDP/capita <sup>5</sup> (current<br>US\$, 2008) | Health<br>expenditure/capita <sup>6</sup><br>(current US\$, 2006) | Energy use <sup>7</sup><br>(kg of oil<br>equivalent/capita,<br>2007) | PM10 <sup>8</sup><br>(ug/m3, 2007) | General government<br>final consumption<br>expenditure <sup>9</sup><br>(% of GDP, 2008) | Type of AAQS** |
|-------------------------------------------------------------------------------------------|------------------------------|-----|------------------------------------------|------|-----------------------------------|-----------------------------------------------------|-------------------------------------------------|-------------------------------------------------------------------|----------------------------------------------------------------------|------------------------------------|-----------------------------------------------------------------------------------------|----------------|
|                                                                                           | PM10                         | SO2 | PM10                                     | SO2  |                                   |                                                     |                                                 |                                                                   |                                                                      |                                    |                                                                                         |                |
| Seychelles<br>(survey respondent)                                                         | 0                            | 0   | 2007                                     | 2007 | 86,956                            | 54                                                  | 9,580                                           | 564                                                               |                                                                      |                                    | 15                                                                                      |                |
| Singapore<br>(Schwela, 2006)                                                              | 150                          | 365 |                                          |      | 4,839,400                         | 100                                                 | 37,597                                          | 1,148                                                             | 5,831                                                                | 41                                 | 11                                                                                      |                |
| Slovak Republic<br>(Council of EU, 2008)                                                  | 50                           | 125 | 2008                                     | 2008 | 5,406,626                         | 57                                                  | 18,212                                          | 1,077                                                             | 3,307                                                                | 15                                 | 17                                                                                      | D              |
| Slovenia<br>(Council of EU, 2008)                                                         | 50                           | 125 | 2008                                     | 2008 | 2,021,316                         | 49                                                  | 27,019                                          | 1,836                                                             | 3,632                                                                | 30                                 |                                                                                         | D              |
| South Africa<br>(Rep. of South Africa,<br>2006)                                           | 75                           | 125 | 2007                                     | 2004 | 48,687,000                        | 61                                                  | 5,678                                           | 497                                                               | 2,807                                                                | 21                                 | 20                                                                                      | G              |
| Spain<br>(Council of EU, 2008)                                                            | 50                           | 125 | 2008                                     | 2008 | 45,555,716                        | 77                                                  | 35,215                                          | 2,712                                                             | 3,208                                                                | 32                                 | 19                                                                                      | D              |
| Sri Lanka<br>(survey respondent)                                                          | 0                            | Yes | 2007                                     | 2003 | 20,156,204                        | 15                                                  | 2,013                                           | 68                                                                | 464                                                                  | 82                                 | 16                                                                                      | S              |
| Sweden<br>(Council of EU, 2008)                                                           | 50                           | 125 | 2008                                     | 2008 | 9,219,637                         | 85                                                  | 51,950                                          | 4,495                                                             | 5,512                                                                | 12                                 | 26                                                                                      | D              |
| Switzerland<br>(survey respondent)                                                        | 50                           | 80  | 2007                                     |      | 7,647,675                         | 73                                                  | 64,327                                          | 6,108                                                             | 3,406                                                                | 26                                 |                                                                                         | S              |
| Thailand<br>(survey respondent)                                                           | 120                          | 300 | 1995                                     | 2001 | 67,386,383                        | 33                                                  | 4,043                                           | 136                                                               | 1,553                                                                | 71                                 | 12                                                                                      | S              |
| Trinidad & Tobago<br>(Rep. of Trinidad and<br>Tobago, 2005; email<br>communication, 2008) | 75                           | 125 | 2008                                     | 2008 | 1,333,388                         | 13                                                  | 18,108                                          | 785                                                               | 11,506                                                               | 101                                | 11                                                                                      | G              |
| Turkey<br>(Rep. of Turkey, 1986)                                                          | 150                          | 150 | 1986                                     | 1986 | 73,914,260                        | 69                                                  | 9,942                                           | 465                                                               | 1,370                                                                | 40                                 | 13                                                                                      |                |
| Uganda<br>(Personal comm., 2003)                                                          | 0                            | 0   | 2003                                     | 2003 | 31,656,865                        | 13                                                  | 453                                             | 28                                                                |                                                                      | 12                                 | 12                                                                                      |                |
| United Kingdom<br>(Council of EU, 2008)                                                   | 50                           | 125 | 2008                                     | 2008 | 61,414,062                        | 90                                                  | 43,541                                          | 3,867                                                             | 3,464                                                                | 15                                 | 22                                                                                      | D              |

| Country Name<br>(Source of AAQS <sup>1</sup> ) | AAQS<br>Pollutant<br>(ug/m3) |     | Year <sup>2</sup> AAQS<br>Set or Revised |      | Population <sup>3</sup><br>(2008) | Urban population <sup>4</sup><br>(% of total, 2008) | GDP/capita <sup>5</sup> (current<br>US\$, 2008) | Health<br>expenditure/capita <sup>6</sup><br>(current US\$, 2006) | Energy use <sup>7</sup><br>(kg of oil<br>equivalent/capita,<br>2007) | PM10 <sup>8</sup><br>(ug/m3, 2007) | General government<br>final consumption<br>expenditure <sup>9</sup><br>(% of GDP, 2008) | Type of AAQS** |
|------------------------------------------------|------------------------------|-----|------------------------------------------|------|-----------------------------------|-----------------------------------------------------|-------------------------------------------------|-------------------------------------------------------------------|----------------------------------------------------------------------|------------------------------------|-----------------------------------------------------------------------------------------|----------------|
|                                                | PM10                         | SO2 | PM10                                     | SO2  |                                   |                                                     |                                                 |                                                                   |                                                                      |                                    |                                                                                         |                |
| United States<br>(EPA, 2009)                   | 150                          | 365 | 2006                                     | 1996 | 304,060,000                       | 82                                                  | 46,350                                          | 7,285                                                             | 7,766                                                                | 21                                 |                                                                                         | S              |
| Venezuela<br>(Maggioria, 2006)                 | 0                            | 365 | 2006                                     | 1995 | 27,935,000                        | 93                                                  | 11,246                                          | 477                                                               | 2,319                                                                | 11                                 | 11                                                                                      |                |
| Vietnam<br>(Schwela, 2006)                     | 150                          | 125 | 2005                                     | 2005 | 86,210,781                        | 28                                                  | 1,051                                           | 58                                                                | 655                                                                  | 55                                 | 6                                                                                       |                |
| Serbia<br>(survey respondent)                  | 50                           | 150 | 2000                                     | 2000 | 7,350,221                         | 52                                                  | 6,811                                           | 408                                                               | 2,141                                                                |                                    | 21                                                                                      |                |
| Zambia<br>(Govt. of Zambia, 1996)              | 70                           | 125 | 1996                                     | 1996 | 12,620,219                        | 35                                                  | 1,134                                           | 57                                                                | 604                                                                  | 40                                 | 9                                                                                       | G              |
| Zimbabwe<br>(Govt. of Zimbabwe,<br>2006)       | 0                            | 0   | 2005                                     | 2005 | 12,462,879                        | 37                                                  |                                                 | 79                                                                | 759                                                                  | 27                                 |                                                                                         |                |
| World<br>(WHO, 2006)                           | 50                           | 20  | 2005                                     | 2005 | 6,697,254,041                     | 50                                                  | 9,042                                           | 809                                                               | 1,819                                                                | 50                                 |                                                                                         | G              |

\*Sub-national AQS

\*\* S = ambient air quality standard, G = ambient air quality guideline, M = maximum permissible concentration, D = EU air quality directive, blank values indicate the type of AAQS is unknown

**References:**

Australian Government (1998) Air Quality: Ambient Air Quality Standards. Department of the Environment, Water, Heritage and the Arts. <http://www.environment.gov.au/atmosphere/airquality/standards.html#air>. Accessed 3 December 2009

Blacklane (2011) Personal communication with the Chief Environmental Officer of the Environment Division. Ministry of Agriculture. Antigua and Barbuda.

Claude Davis & Associates. (2006) Natural Resources Conservation Authority Ambient Air Quality Guideline Document Hamilton, ON.

Cojocaru A (2008) Air Pollution in the Republic of Moldova: Current Status and Future Prospects in [Simulation and Assessment of Chemical Processes in a Multiphase Environment](#) eds. Barnes I & Kharytonov M.M., Springer Netherlands, Dordrecht

Council of the European Union (2008) DIRECTIVE 2008/50/EC OF THE EUROPEAN PARLIAMENT AND OF THE COUNCIL of 21 May 2008 on ambient air quality and cleaner air for Europe. Official Journal of the European Communities. <http://eur-lex.europa.eu/LexUriServ/LexUriServ.do?uri=OJ:L:2008:152:0001:0044:EN:PDF>. Accessed on 4 December 2009

Environmental Protection Agency (EPA). (2009) National Ambient Air Quality Standards. Air and Radiation <http://www.epa.gov/air/criteria.html>. Accessed 20 December 2009

Environmental Protection Department (2004) Ambient Air Quality. Ministry of the Environment, Water Resources and Drainage - Government of Barbados <http://www.epd.gov.bb/articles.cfm?articlecategory=13&category=1>. Accessed 4 December 2009

Etyemezian V, Tesfaye M, Yimer A, Chow JC, Mesfin D, Nega T, Nikolich G, Watson JG, Wondmagegn M (2005) Results from a pilot-scale air quality study in Addis Ababa, Ethiopia. Atmos Environ 39:7849–7860

Government of the Peoples Republic of Bangladesh, Ministry of Environment and Forests (2005) S.R.O. No: 220-Law/2005: Schedule-2 Air Quality Standards (Unofficial English Version). Clean Air Initiative - Asia [http://www.cleanairnet.org/caiasia/1412/articles-69642\\_standards.doc](http://www.cleanairnet.org/caiasia/1412/articles-69642_standards.doc). Accessed 4 December 2009

Government of India, Central Pollution Control Board (2009) Ministry of Environment and Forests Notification: National Ambient Air Quality Standards. The Gazette of India: Extraordinary [http://www.cpcb.nic.in/upload/Latest/Latest\\_49\\_MoEF\\_Notification.pdf](http://www.cpcb.nic.in/upload/Latest/Latest_49_MoEF_Notification.pdf). Accessed 6 December 2009

Government of Indonesia, Ministry of the Environment. (1999) Peraturan Pemerintah No. 41 Tahun 1999, tentang Pengendalian Pencemaran Udara, BPLHD JAWA BARAT Badan Pengeloan Lingkungan Hidup [http://www.bplhdjabar.go.id/index.php/component/docman/cat\\_view/86-perundang-undangan](http://www.bplhdjabar.go.id/index.php/component/docman/cat_view/86-perundang-undangan). Access 6 December 2009

Government of Israel (1992) 1992- (אוויר איכות - ב"התשנ, מפגעי למניעת תקנות ם

Government of Kenya (2009) Highlights on Draft Air Quality Regulations, 2008. National Environmental Management Authority. [http://www.nema.go.ke/index.php?option=com\\_content&task=view&id=52&Itemid=60](http://www.nema.go.ke/index.php?option=com_content&task=view&id=52&Itemid=60) Accessed 29 December 2009

Government of Senegal (2003) Pollution atmosphérique - Norme de rejets NS-05-062. Edité et diffusé par l'Association Sénégalaise de Normalisation (ASN), Dakar

Government of Zambia (1996) The Air Pollution Control (Licencing and Emissions Standards) Regulations, 1996. Environmental Council of Zambia <http://www.necz.org.zm/cap204/Regulations/air.html>. Accessed 20 December 2009

Government of Zimbabwe (2006) Environmental Management Act [Chapter 20:27]. Veritas Trust  
Health Canada (2006) Regulations Related to Health and Air Quality. Environmental and Workplace Health. <http://www.hc-sc.gc.ca/ewh-semt/air/out-ext/reg-eng.php#a2>. Accessed 5 December 2009

Kerbachi R, Boughedaoui M, Bounoua L, Keddam M (2006) Ambient air pollution by aromatic hydrocarbons in Algiers. Atmos Environ 40(21): 3995-4003

Ministry of Environment (2006) Statement by Senator the Honourable Dr. Marcus Bethel, Minister of Energy and the Environment of the Commonwealth of the Bahamas at the High-Level Segment of the Fourteenth Session of the Commission on Sustainable Development. United Nations, New York. . [http://www.un.org/esa/sustdev/csd/csd14/statements/bahamas\\_11may.pdf](http://www.un.org/esa/sustdev/csd/csd14/statements/bahamas_11may.pdf) Accessed on 4 December 2009

Law Revision Commissioner (2003) Environmental Protection Act Chapter 328: Revised Edition 2003. Government of Belize, Belmopan

Maggioria CD, Lopez – Silva JA (2006) Vulnerability to Air Pollution in Latin America and the Caribbean Region. Latin America and Caribbean Region Sustainable Development Working Paper 28. The World Bank

Ministry for the Environment (2004) 5 Air Quality Criteria: National Ambient Air Quality Standards. <http://www.mfe.govt.nz/publications/air/assessing-discharges-land-transport-jun08/html/page6.html>. Accessed 8 December 2009

Ministre de l'Habitat, de l'Urbanisme et de l'Aménagement de l'Espace. (2003) Dahir n° 1-03-61 du 10 rabii I 1424 (12 mai 2003) portant promulgation de la loi n° 13-03 relative à la lutte contre la pollution de l'air. *Bulletin officiel*

<http://www.mhuae.gov.ma/NR/exeres/66386A00-F8F8-4E43-9E0B-538F28E56102.htm> . Accessed 4 December 2009

Ministry of Health. (1993) NORMA OFICIAL MEXICANA NOM-022-SSA1-1993. "SALUD AMBIENTAL. CRITERIO PARA EVALUAR LA CALIDAD DEL AIRE AMBIENTE, CON RESPECTO AL BIOXIDO DE AZUFRE (SO<sub>2</sub>). VALOR NORMADO PARA LA CONCENTRACION DE BIOXIDO DE AZUFRE (SO<sub>2</sub>) EN EL AIRE AMBIENTE, COMO MEDIDA DE PROTECCION A LA SALUD DE LA POBLACION". Diario Oficial de la Federación, México, D.F., a 18 de agosto de 1994

Republic of South Africa (2006) The National Air Quality Management Programme (NAQMP) Output C.4 Initial State of Air Report. Department of Environmental Affairs and Tourism. <http://soer.deat.gov.za/frontpage.aspx?m=2>. Accessed 9 March 2008.

Republic of Trinidad and Tobago (2005) The Air Pollution Rules, 2005. Legal Notice No.

Republic of Turkey (1986) HAVA KALİTESİNİN KORUNMASI YÖNETMELİĞİ. Resmi Gazete : 02.11.1986 tarih ve 19269 sayı

Sah RA (2003) Advocating and Enforcing Air-Quality Standards in Nepal. Better Air Quality 2003 Conference.

[http://www.cleanairnet.org/baq2003/1496/articles-58046\\_resource\\_1.pdf](http://www.cleanairnet.org/baq2003/1496/articles-58046_resource_1.pdf). Accessed 8 December 2009

Sakhalin Energy. (2005) Environmental Impact Assessment Addendum (2005) Sakhalin Energy Investment Company 0000-S-90-04-P-7069-00-E [http://www.sakhalinenergy.com/en/documents/doc\\_lender\\_eia\\_9.pdf](http://www.sakhalinenergy.com/en/documents/doc_lender_eia_9.pdf). Accessed 18 December 2009.

Sarr MB (2008) Sulphur Oxide and Its Environmental Impacts. National Consultative Workshop on Sulphur Reduction in Diesel Fuel <http://www.unep.org/pcfv/PDF/Gambia-SulphurEnvironImpacts.pdf>. Accessed 5 December 2009

Schwela D, Haq G, Huizenga C, Wha – Jin H, Fabian H, Ajero M (2006) Urban Air Pollution in Asian Cities: Status, Challenges, and Management. Earthscan, London

SEMARNAT (2005) MODIFICACION A LA NORMA OFICIAL MEXICANA NOM-025-SSA1-1993, SALUD AMBIENTAL. CRITERIOS PARA EVALUAR LA CALIDAD DEL AIRE AMBIENTE, CON RESPECTO A MATERIAL PARTICULADO. VALOR DE CONCENTRACION MAXIMA DE MATERIAL

PARTICULADO PARA PARTICULAS SUSPENDIDAS TOTALES PST, PARTICULAS MENORES DE 10 MICROMETROS  $PM_{10}$  Y PARTICULAS MENORES DE 2.5 MICROMETROS  $PM_{2.5}$  EN EL AIRE AMBIENTE COMO MEDIDA DE PROTECCION A LA SALUD DE LA POBLACION, PARA QUEDAR COMO NORMA OFICIAL MEXICANA NOM-025-SSA1-1993, SALUD AMBIENTAL.

[http://www.semarnat.gob.mx/leyesynormas/Normas%20Oficiales%20Mexicanas%20vigentes/NOM\\_001\\_REC NAT.pdf](http://www.semarnat.gob.mx/leyesynormas/Normas%20Oficiales%20Mexicanas%20vigentes/NOM_001_REC NAT.pdf) . Accessed 8 December 2009

WHO (2003) Air Quality and Health in Eastern Europe, Caucasus and Central Asia. Report on the WHO Workshop St. Petersburg.

WHO (2006) Air Quality Guidelines: Global Update 2005. WHO Regional Office for Europe, Copenhagen





AAQS Survey

UC Berkeley Survey on AQGs

September 2007 - 1

School of Public Health,  
University of California, Berkeley, USA  
September 2007  
Survey on Air Quality Guidelines and Standards

Professor Kirk R. Smith  
<krksmith@berkeley.edu>  
Candace Vahlsing  
<vahlsing@berkeley.edu>

Please complete the following questionnaire. The questions of the most importance to us are in bold, if you are not able to complete the entire questionnaire, any attempt to answer the questions in bold would be much appreciated.

Country   
Name of respondent   
Title and agency   
Postal address for receiving final report of survey results and a complimentary copy of the *WHO Air Quality Guidelines, Global Update 2005*

**Section 1: Background Information on Air Quality Standards**

1. Does your country have a law or act mandating the establishment of ambient air quality standards (AAQSs)?
  - yes
    - a. What year did your country implement the law or act?
    - b. Please check the pollutants that your country has ambient air quality standards (AAQSs) for  carbon monoxide  SO<sub>x</sub>  NO<sub>2</sub>  lead  ozone  Total PM  PM<sub>10</sub>  PM<sub>2.5</sub>  other \_\_\_\_\_
  - no
    - a. Does your country plan to establish AAQSs?  yes  no
2. Is your country part of any regional air quality agreement, regulation, or standard?
  - yes, please list \_\_\_\_\_
  - no
3. Is the establishment of your countries ambient air quality standards (AAQS) tied to an international loan agreement or debt package with, for example, the World Bank?
  - yes, please write the name of the development organization it is with \_\_\_\_\_
  - no
4. What type of AAQSs does your country have? (please check all that apply)
  - AAQSs for different land use practices, for example residential or industrial
  - national AAQS  state/municipal/local AAQS
5. Does your country use a Pollution Standards Index?
  - yes
    - a. Which standards are used to calculate the Pollution Standard Index? (check all that apply)
      - WHO Air Quality Guidelines
      - Standards from another country, Please specify the country \_\_\_\_\_
      - the national AAQS
      - other \_\_\_\_\_
  - no

**Section 2: WHO AQG**

6. Before reading this questionnaire, were you aware that the World Health Organization (WHO) publishes

- a. air quality guidelines for Europe?  yes  no
- b. air quality guidelines that are globally applicable?  yes  no

7. Does your country have ambient air quality standards (legally binding) or guidelines (voluntary) for Particulate Matter (PM)?

- yes, we have (please circle) standards guidelines
  - a. What year were they established? \_\_\_\_\_
  - b. When were they last updated? \_\_\_\_\_
- no (please go to question 11)

8. What indicator of PM does your country have standards for? (please check all that apply and write the concentration of the standard)

| Pollutant                                                | Standard (mass concentration) |                            |
|----------------------------------------------------------|-------------------------------|----------------------------|
|                                                          | Annual                        | Daily                      |
| <input type="checkbox"/> Total Suspended Particles (TSP) | _____ (ug/m <sup>3</sup> )    | _____ (ug/m <sup>3</sup> ) |
| <input type="checkbox"/> Thoracic particles              | _____ (ug/m <sup>3</sup> )    | _____ (ug/m <sup>3</sup> ) |
| <input type="checkbox"/> PM <sub>10</sub>                | _____ (ug/m <sup>3</sup> )    | _____ (ug/m <sup>3</sup> ) |
| <input type="checkbox"/> PM <sub>2.5</sub>               | _____ (ug/m <sup>3</sup> )    | _____ (ug/m <sup>3</sup> ) |
| <input type="checkbox"/> other _____                     | _____ (ug/m <sup>3</sup> )    | _____ (ug/m <sup>3</sup> ) |

9. Please check all of the following documents that have played a significant role in the deliberations for setting the AAQS for PM, and indicate how the evidence in the document was used.

| Document                                                                                                                | Evidence in document evaluated, and accepted | Evidence in document evaluated, but not used | Evidence in document evaluated, and modified for local conditions |
|-------------------------------------------------------------------------------------------------------------------------|----------------------------------------------|----------------------------------------------|-------------------------------------------------------------------|
| <input type="checkbox"/> <i>Air Quality Guidelines for Europe</i> (published by the WHO in 1987)                        | <input type="checkbox"/>                     | <input type="checkbox"/>                     | <input type="checkbox"/>                                          |
| <input type="checkbox"/> <i>Air Quality Guidelines for Europe 2<sup>nd</sup> edition</i> (published by the WHO in 2000) | <input type="checkbox"/>                     | <input type="checkbox"/>                     | <input type="checkbox"/>                                          |
| <input type="checkbox"/> <i>Guidelines for Air Quality</i> (published by the WHO in 2000, with a global focus)          | <input type="checkbox"/>                     | <input type="checkbox"/>                     | <input type="checkbox"/>                                          |
| <input type="checkbox"/> <i>Air Quality Guidelines: Global Update 2005</i> (published by the WHO in 2006)               | <input type="checkbox"/>                     | <input type="checkbox"/>                     | <input type="checkbox"/>                                          |

10. Have any of the documents checked in Question 9 been acknowledged in a legal act?  
 yes  no

11. The WHO has promulgated PM AQGs using different approaches that try to reflect in varying degree the growing scientific recognition that there are no clear thresholds, i.e., levels of pollution below which there is no effect. The figures below represent three of these methods.  
 (see the following page)

**Method A: Risk Coefficients with no specific recommended concentrations (WHO, 2000)**

Table 11. Summary of relative risk estimates for effects of long-term exposure to particulate matter on the morbidity and mortality associated with a 10 µg/m<sup>3</sup> increase in the concentration of PM10 or PM2.5

| Endpoint (reference)                          | Relative risk for PM2.5 (95% confidence interval) | Relative risk for PM10 (95% confidence interval.) |
|-----------------------------------------------|---------------------------------------------------|---------------------------------------------------|
| Mortality (26)                                | 1.14 (1.04–1.24)                                  | 1.10 (1.03–1.18)                                  |
| Mortality (115)                               | 1.07 (1.04–1.11)                                  | n.a.                                              |
| Bronchitis (154)                              | 1.34 (0.94, 1.99)                                 | 1.29 (0.96–1.83)                                  |
| % change in FEV <sub>1</sub> , children (155) | - 1.9% (- 3.1% to - 0.6%) <sup>a</sup>            | - 1.2% (- 2.3% to - 0.1%)                         |
| % change in FEV <sub>1</sub> , adults (151)   |                                                   | - 1.0% (n.a.)                                     |

**Method B:  
Concentration Guidelines  
alone (WHO, 2006)**

| Guidelines          |                                                                       |
|---------------------|-----------------------------------------------------------------------|
| PM <sub>2.5</sub> : | 10 µg/m <sup>3</sup> annual mean<br>25 µg/m <sup>3</sup> 24-hour mean |
| PM <sub>10</sub> :  | 20 µg/m <sup>3</sup> annual mean<br>50 µg/m <sup>3</sup> 24-hour mean |

**Method C: Guidelines with Interim Targets and some risk information (WHO, 2006)**

| WHO air quality guidelines and interim targets for particulate matter: annual mean concentrations <sup>a</sup> |                                       |                                        |                                                                                                                                                                                                         |
|----------------------------------------------------------------------------------------------------------------|---------------------------------------|----------------------------------------|---------------------------------------------------------------------------------------------------------------------------------------------------------------------------------------------------------|
|                                                                                                                | PM <sub>10</sub> (µg/m <sup>3</sup> ) | PM <sub>2.5</sub> (µg/m <sup>3</sup> ) | Basis for the selected level                                                                                                                                                                            |
| Interim target-1 (IT-1)                                                                                        | 70                                    | 35                                     | These levels are associated with about a 15% higher long-term mortality risk relative to the AQG level.                                                                                                 |
| Interim target-2 (IT-2)                                                                                        | 50                                    | 25                                     | In addition to other health benefits, these levels lower the risk of premature mortality by approximately 6% [2–11%] relative to the IT-1 level.                                                        |
| Interim target-3 (IT-3)                                                                                        | 30                                    | 15                                     | In addition to other health benefits, these levels reduce the mortality risk by approximately 6% [2–11%] relative to the IT-2 level.                                                                    |
| Air quality guideline (AQG)                                                                                    | 20                                    | 10                                     | These are the lowest levels at which total, cardiopulmonary and lung cancer mortality have been shown to increase with more than 95% confidence in response to long-term exposure to PM <sub>10</sub> . |

Please indicate which approach provides the most useful information for setting the AAQs for your country. Here, we are not asking you to judge the specific PM levels in the above examples, but rather to judge the utility of the method used by WHO to present them

- Method A: Risk coefficients with no specific guidelines provided
- Method B: Guidelines with no risk coefficients provided
- Method C: Guidelines with Interim Targets (that provide a step-wise approach to air pollution management) with some risk information
- all three methods are necessary
- none of the three methods are useful
- another method, please explain \_\_\_\_\_

12. Please explain the reasons for your answer to the previous question. We urge you to take all the space you need as this is an important part of the survey. Please consider

- scientific issues, for example whether a method better reflects physical reality in your opinion;
- regulatory concerns, for example whether a method would be easier to implement in regulation;
- policy issues, for example whether a method is easier explain to policy makers and the public.

---



---



---

13. Does your country have ambient air quality standards or guidelines for SO<sub>2</sub>?

- yes, we have standards
- yes, we have guidelines
  - a. What year were they established? \_\_\_\_\_
  - b. When were they last updated? \_\_\_\_\_
- no (please go to question 18)

14. What averaging time is used for each SO<sub>2</sub> AAQS? (please check all that apply and write the concentration of the standard)

- | Pollutant                                  | Standard (mass concentration) |
|--------------------------------------------|-------------------------------|
| <input type="checkbox"/> 24 hour average   | _____ ug/m <sup>3</sup>       |
| <input type="checkbox"/> 8 hour average    | _____ ug/m <sup>3</sup>       |
| <input type="checkbox"/> 10 minute average | _____ ug/m <sup>3</sup>       |
| <input type="checkbox"/> annual average    | _____ ug/m <sup>3</sup>       |
| <input type="checkbox"/> other _____       | _____ ug/m <sup>3</sup>       |

15. Please check the following documents if they have played a significant role in the deliberations for setting the AAQS for SO<sub>2</sub> and indicate how the evidence in the document was used.

| Document                                                                                                                | Evidence in document evaluated, and accepted | Evidence in document evaluated, but not used | Evidence in document evaluated, and modified for local conditions |
|-------------------------------------------------------------------------------------------------------------------------|----------------------------------------------|----------------------------------------------|-------------------------------------------------------------------|
| <input type="checkbox"/> <i>Air Quality Guidelines for Europe</i> (published by the WHO in 1987)                        | <input type="checkbox"/>                     | <input type="checkbox"/>                     | <input type="checkbox"/>                                          |
| <input type="checkbox"/> <i>Air Quality Guidelines for Europe 2<sup>nd</sup> edition</i> (published by the WHO in 2000) | <input type="checkbox"/>                     | <input type="checkbox"/>                     | <input type="checkbox"/>                                          |
| <input type="checkbox"/> <i>Guidelines for Air Quality</i> (published by the WHO in 2000, with a global focus)          | <input type="checkbox"/>                     | <input type="checkbox"/>                     | <input type="checkbox"/>                                          |
| <input type="checkbox"/> <i>Air Quality Guidelines: Global Update 2005</i> (published by the WHO in 2006)               | <input type="checkbox"/>                     | <input type="checkbox"/>                     | <input type="checkbox"/>                                          |

16. Have any of the documents checked in Question 15 been acknowledged in a legal act?

- yes  no

17. Did you consider the secondary formation of particles when setting the AAQS for SO<sub>2</sub>?

- yes  no

18. Does your country plan to use the WHO AQG to set or update your AAQSs?

- yes
  - a. We plan to use them to set AAQSs  
For which pollutants? (please check)  PM  SO<sub>2</sub>  NO<sub>2</sub>  O<sub>3</sub>
  - b. We plan to use them to update AAQSs  
For which pollutants? (please check)  PM  SO<sub>2</sub>  NO<sub>2</sub>  O<sub>3</sub>
- no

19. What additional information do you want from the WHO in order to help set your AAQSs?

---



---

**Section 3: The Evidence-base used to Determine AAQs and the Standard Setting Process**

(If you answered “yes” to either question 7 or 13 please continue. If you answered “no” to question 7 and 13 and have begun planning your AAQs, please answer the following questions. If setting AAQs is not a current priority, please skip to the comments section – Question 31 - at the end of the questionnaire.)

20. What types of studies are used to set the AAQs in your country? (please check all that apply)

- toxicology studies (animal studies conducted in a lab)
- epidemiology studies in natural settings (studies examining the causation between exposure to air pollution and health effects)
- epidemiology studies in occupational settings
- controlled human exposure studies (studies in which humans are exposed to air pollutants in a controlled lab environment)
- monitoring data on current pollution concentrations in your country
- reports from nongovernmental organizations (NGOs)
- other \_\_\_\_\_

21. Please rate the importance of the studies you selected in the previous question when determining your AAQs.

| Type of Study                     | Important                | Partially Important      | Not important            |
|-----------------------------------|--------------------------|--------------------------|--------------------------|
| toxicology studies                | <input type="checkbox"/> | <input type="checkbox"/> | <input type="checkbox"/> |
| epidemiology studies              | <input type="checkbox"/> | <input type="checkbox"/> | <input type="checkbox"/> |
| controlled human exposure studies | <input type="checkbox"/> | <input type="checkbox"/> | <input type="checkbox"/> |
| Reports from NGOs                 | <input type="checkbox"/> | <input type="checkbox"/> | <input type="checkbox"/> |
| other                             | <input type="checkbox"/> | <input type="checkbox"/> | <input type="checkbox"/> |

22. Do you require the epidemiology studies used to set your AAQs to be conducted in your own country?

- yes  no

23. Do epidemiology, toxicology and controlled human exposure studies have to be peer reviewed to be used to set the AAQs in your country?

- yes  no

24. Which of the following standards, if any, are your AAQs based on (please check)

- European Union air quality directives
- the United States air quality standards
- California’s air quality standards
- the standards of another country in the region  
If so, which country \_\_\_\_\_
- International Agency for Research on Cancer (IARC) designation

25. Who are the participants involved in setting the AAQs? (please check all that apply)

- government/parliament officials  consultants  development organizations
- academic scientists  government/parliament scientists  lawyers
- economists  businesses  environment or health NGOs
- community based organizations (CBOs)
- other \_\_\_\_\_



26. Which of the following factors, if any, are considered when setting an AAQS? (please check all that apply)

- health effects
- cost
- concentration of air pollutant
- concentration of other pollutants that might affect the pollutant of interest
- the effect of the pollutant of interest on climate change
- other \_\_\_\_\_
- other \_\_\_\_\_
- exposure duration
- feasibility
- non-health environmental effects
- susceptible populations
- number of people exposed

27. Do you require a risk assessment to be conducted in your country on the pollutant of interest, before an AAQS is set?

- yes
- no

28. Which official or agency makes the final decision about each AAQS?

\_\_\_\_\_

29. Is an economic analysis done before or after the AAQSs are set?

- before
- after
- neither

30. Do you plan to include an evaluation of the how PM or SO<sub>2</sub> interact with gases that affect the climate in your next revision of the AAQSs?

- yes
- no

31. Comments/ Issues related to air quality standards (for example: Is there a source of information you find valuable that has not been mentioned above? What other information would be valuable, when setting your AAQS? What type of international assistance would you prefer? What other sources do you need? Any other suggestions that you want to share are welcome.)

Please make sure your contact information is noted at the beginning of the questionnaire so that you receive a copy of the final report and WHO publication.

If not using the addressed envelope please return to:

Candace Vahlsing  
 Division of Environmental Health Sciences  
 UC Berkeley School of Public Health  
 50 University Hall, # 7360  
 Berkeley, CA 94720- 7360

Thank you very much for taking the time to complete this questionnaire. We appreciate your participation.

**References**

*Air Quality Guidelines for Europe*, 2<sup>nd</sup> Edition. Copenhagen, WHO Regional Office for Europe, 2000 (WHO Regional Publications, European Series, No 91).

*Air Quality Guidelines for Europe: Global Update 2005*. Copenhagen, WHO Regional Office for Europe, 2006.

Submit by Email
